# Supplementary material
Source: PubMed Central journal article supplement (PMC10103310)

## Supplemental Material Table of Contents

Table S1. Oligonucleotides used to target Cas9 mediated KO of *Cln5*

Table S2. Primer set used to sequence targeted region of *Cln5* in OK cells

Table S3. Primers for qPCR in OK cells

Table S4. Antibodies for indirect immunofluorescence in OK cells

Table S5. Oligos for generation and characterization of CIC-5 KO mice

Table S6. The fractional distribution of cubilin and megalin for WT and CIC-5 KO mice used in the axial model of protein uptake along the PT

Table S7. Average fractional colocalization (Manders' coefficient) of megalin with endocytic markers for Rescue, CIC-5 KO, and Uncoupled cells

Table S8. Average fractional overlap (Manders' coefficient) between endocytic markers for Rescue, CIC-5 KO, and Uncoupled cells.

Table S9. Fractional trafficking kinetics of megalin in Rescue, CIC-5 KO, and Uncoupled cells as percentage of megalin in the originating compartment per minute (mean  $\pm$  SEM)

Figure S1. Impact of CIC-5 KO and Rescue on endocytic uptake of albumin confirmed in multiple clonal lines

Figure S2. Expression of megalin and cubilin receptors is coordinately affected by CIC-5 KO

Figure S3. Quantitation of the overlap between endocytic markers in Rescue and CIC-5 KO cells

Figure S4. Polarity of degraded  $^{125}\text{I}$ -albumin excretion is similar in Rescue and CIC-5 KO cells

Figure S5. Megalin expression is altered by expression of the uncoupled CIC-5 mutant

Figure S6. Megalin distribution is altered by the expression of uncoupled CIC-5 mutant

Figure S7. Simulated effect of error in biochemical measurements and assumptions on intracellular trafficking kinetics

Figure S8. Sensitivity of megalin internalization to intracellular trafficking kinetics

Figure S9. Calibration curves for chloride concentrations and pH

Figure S10. Characterization of CIC-5 KO mice

**Table S1. Oligonucleotides used to target Cas9 mediated KO of *Cln5***

| Guide | Strand | Oligo | Sequence 5'-3'                    |
|-------|--------|-------|-----------------------------------|
| G1    | (-)    | crRNA | AACATGCCACATGTACAAGG              |
|       |        | pHRS  | F: AATTATCCCCCTTGTACATG GGCATGTTG |
|       |        |       | R: GATCCAACATGCCACATGTACAAGGGGGAT |
| G2    | (+)    | crRNA | GGCCTGAGCTTGGGCAAAGA              |
|       |        | pHRS  | F: AATTATGGCCTGAGCTTGGGCAAAGAAGGG |
|       |        |       | R: GATCCCCTTCTTTGCCAAGCTCAGGCCAT  |

**Table S2. Primer set used to sequence targeted region of *Cln5* in OK cells**

|                | Sequence 5'-3'            |
|----------------|---------------------------|
| <b>Forward</b> | ATTCTGAGTGGTTTCATCATTCGAG |
| <b>Reverse</b> | GTGCTCCCTGTGGGAATCTC      |

**Table S3. Primers for qPCR in OK cells**

| Gene         |           | Sequence 5'-3'         |
|--------------|-----------|------------------------|
| <i>Lrp2</i>  | <b>F:</b> | AGCCGGACCTGTGTTGATTT   |
|              | <b>R:</b> | AAATCAGAGATGCCACGCCA   |
| <i>Cubn</i>  | <b>F:</b> | AAGAAGGAAAGGTCCTGCATGT |
|              | <b>R:</b> | G TTCAGGAGGGTGACTAGAGC |
| <i>Gapdh</i> | <b>F:</b> | GAGATGCTGGAGCCGAGTA    |
|              | <b>R:</b> | GTGGTTCACCCCATCAC      |

**Table S4. Antibodies for indirect immunofluorescence in OK cells**

| Primary Antibody                  | Target | or | Company           | Catalog #   | Source | Working Dilution |
|-----------------------------------|--------|----|-------------------|-------------|--------|------------------|
| Megalin                           |        |    | (Zou et al. 2004) | --          | Rabbit | 1:1000           |
| Rab11                             |        |    | Abcam             | ab65200     | Rabbit | 1:500            |
| Rab7                              |        |    | Sigma             | R8779       | Mouse  | 1:200            |
| EEA1 (E-8)                        |        |    | Santa Cruz        | sc-365652   | Mouse  | 1:50             |
| Anti-mouse Alexa Fluor 488        |        |    | Invitrogen        | A11029      | Goat   | 1:500            |
| Anti-rabbit Alexa Fluor 488       |        |    | Invitrogen        | A11034      | Goat   | 1:500            |
| Anti-mouse Alexa Fluor 647        |        |    | Invitrogen        | A21236      | Goat   | 1:500            |
| Anti-mouse Alexa Fluor 647        |        |    | Invitrogen        | A21245      | Goat   | 1:500            |
| F(ab) anti-mouse Alexa Fluor 488  |        |    | Jackson Immuno    | 115-547-003 | Goat   | 1:500            |
| F(ab) anti-rabbit Alexa Fluor 488 |        |    | Jackson Immuno    | 111-547-003 | Goat   | 1:500            |
| F(ab) anti-mouse (unconjugated)   |        |    | Jackson Immuno    | 115-007-003 | Goat   | 1:65             |
| F(ab) anti-rabbit (unconjugated)  |        |    | Jackson Immuno    | 111-007-003 | Goat   | 1:65             |

**Table S5. Oligos for generation and characterization of CIC-5 KO mice**

|                       |    | Sequence 5'-3'                                                                                                                        |
|-----------------------|----|---------------------------------------------------------------------------------------------------------------------------------------|
| Clcn5-E211-guide3     |    | CCAGGGGGCCCTCCTTGCCCCGTTTTAGAGCTAGAAATAGCA                                                                                            |
| Clcn5-E211X-HDR       |    | CCTTGTCATCAAAACTATCACTTTGGTGTGGCGGTGTCATCTGGCTTGAGCCTGGGC<br>AAATGAATCCCCTGGTGCACGTGGCTTGCTGCTGTGGAACATCTTGTGCCACTGCT<br>TCAACAAATACC |
| Sequencing<br>Primers | F: | TGCTGAGGAGTGATAGCGTT                                                                                                                  |
|                       | R: | TGAGTATCCCTAAACACCTGTGG                                                                                                               |

**Table S6. The fractional distribution of cubilin and megalin for WT and CIC-5 KO mice used in the axial model of protein uptake along the PT**

| WT distribution |       |       |       | CIC-5 KO distribution |       |       |       |
|-----------------|-------|-------|-------|-----------------------|-------|-------|-------|
|                 | S1    | S2    | S3    |                       | S1    | S2    | S3    |
| <b>Cubilin</b>  | 0.608 | 0.375 | 0.018 | <b>Cubilin</b>        | 0.699 | 0.284 | 0.017 |
| <b>Megalyn</b>  | 0.309 | 0.646 | 0.046 | <b>Megalyn</b>        | 0.400 | 0.551 | 0.049 |

**Table S7. Average fractional colocalization (Manders' coefficient) of megalin with endocytic markers for Rescue, CIC-5 KO, and Uncoupled cells**

| Manders' Coefficient | Rescue |        |    | CIC-5 KO |        |    | Uncoupled |        |    |
|----------------------|--------|--------|----|----------|--------|----|-----------|--------|----|
|                      | Mean   | SEM    | N  | Mean     | SEM    | N  | Mean      | SEM    | N  |
| $M_{EEA1}$           | 0.0831 | 0.0146 | 23 | 0.1514   | 0.0172 | 27 | 0.1714    | 0.0274 | 22 |
| $M_{Rab7}$           | 0.3197 | 0.0456 | 25 | 0.3424   | 0.0656 | 25 | 0.2834    | 0.0595 | 25 |
| $M_{Rab11}$          | 0.6835 | 0.0285 | 20 | 0.7130   | 0.0217 | 20 | 0.5407    | 0.0215 | 15 |
| $M_{LysoTracker}$    | 0.0296 | 0.0090 | 15 | 0.0223   | 0.0057 | 15 | 0.0589    | 0.0225 | 15 |

**Table S8. Average fractional overlap (Manders' coefficient) between endocytic markers for Rescue, CIC-5 KO, and Uncoupled cells.**

| Manders' Coefficient | Rescue |        |    | CIC-5 KO |        |    | Uncoupled |        |    |
|----------------------|--------|--------|----|----------|--------|----|-----------|--------|----|
|                      | Mean   | SEM    | N  | Mean     | SEM    | N  | Mean      | SEM    | N  |
| $EEA1_{Rab7}$        | 0.3997 | 0.0449 | 15 | 0.4711   | 0.0679 | 15 | 0.5396    | 0.0328 | 15 |
| $EEA1_{Rab11}$       | 0.2017 | 0.0269 | 15 | 0.0928   | 0.0250 | 13 | 0.1387    | 0.243  | 15 |
| $Rab7_{EEA1}$        | 0.0981 | 0.0189 | 15 | 0.1043   | 0.0207 | 15 | 0.1142    | 0.0171 | 15 |
| $Rab7_{Rab11}$       | 0.0931 | 0.0294 | 14 | 0.0806   | 0.0208 | 14 | 0.1351    | 0.0316 | 15 |
| $Rab11_{EEA1}$       | 0.0367 | 0.0095 | 15 | 0.0045   | 0.0020 | 13 | 0.0228    | 0.0078 | 15 |
| $Rab11_{Rab7}$       | 0.1399 | 0.0242 | 14 | 0.0616   | 0.0115 | 14 | 0.1343    | 0.0223 | 15 |

**Table S9. Fractional trafficking kinetics of megalin in Rescue, CIC-5 KO, and Uncoupled cells as percentage of megalin in the originating compartment per minute (mean  $\pm$  SEM). The synthesis ( $S$ ) rate and degradation ( $k_D$ ) rates represent the percent of total megalin synthesized per minute and megalin in  $M_{lys}$  that is degraded per minute, respectively.**

| Rate        | Rescue          | CIC-5 KO        | Uncoupled       |
|-------------|-----------------|-----------------|-----------------|
| $k_e$       | 8.31 $\pm$ 0.69 | 8.31 $\pm$ 0.69 | 6.43 $\pm$ 0.56 |
| $k_{m,1}$   | 3.23 $\pm$ 0.97 | 1.72 $\pm$ 0.65 | 1.26 $\pm$ 0.49 |
| $k_{DAT,f}$ | 3.10 $\pm$ 0.67 | 1.65 $\pm$ 0.31 | 1.21 $\pm$ 0.26 |
| $k_{DAT,s}$ | 0.94 $\pm$ 0.18 | 0.86 $\pm$ 0.23 | 0.89 $\pm$ 0.24 |
| $k_r$       | 0.94 $\pm$ 0.12 | 0.77 $\pm$ 0.11 | 0.94 $\pm$ 0.15 |
| $k_{m,2}$   | 1.10 $\pm$ 0.18 | 1.52 $\pm$ 0.37 | 1.0 $\pm$ 0.24  |
| $k_d$       | 12.6 $\pm$ 4.55 | 24.5 $\pm$ 9.34 | 5.01 $\pm$ 2.19 |
| $S$         | 0.31 $\pm$ 0.02 | 0.38 $\pm$ 0.03 | 0.25 $\pm$ 0.02 |

## Supplemental Figure Legends

**Figure S1. Impact of CIC-5 KO and Rescue on endocytic uptake of albumin confirmed in multiple clonal lines.** (A) Genomic sequence showing insertion and deletion mutations (red) causing frameshifts predicted to result in early termination of protein translation in CIC-5 KO clones 2-6. The codon encoding the gating glutamate (E225) is shown in blue. (B) Cells from the OK parental population, CIC-5 KO clones 1-6, and Rescue clones 1 and 2 were incubated for 30-60 min with 40  $\mu\text{g/ml}$  Alexa Fluor 647-albumin and then solubilized. Uptake of fluorescent albumin was quantified by spectrofluorimetry as described in Methods and then normalized to the uptake by the OK parental population ( $n=2-4$ ). Each experiment included a parental OK control but did not always include all of the KO or Rescue clones. Every independent experiment is indicated by a different symbol. Symbols in dark gray are the same data included in Figure 1C.

**Figure S2. Expression of megalin and cubilin receptors is coordinately affected by CIC-5 KO.** (A) Rescue and CIC-5 KO cells were incubated for 30 min with 100  $\mu\text{g/ml}$  Alexa Fluor 647 albumin on ice and then solubilized. Surface bound albumin was quantified by spectrofluorimetry and normalized to Rescue. \*\*\*\* $P<.0001$  ( $n=24$ ) using one-way ANOVA Tukey's multiple comparison test. (B) Rescue and CIC-5 KO cells were incubated with the indicated concentrations of Alexa Fluor 647 albumin at 37°C for 15 min and then rapidly washed and solubilized, and cell-associated albumin was assessed by spectrofluorimetry. (C) Albumin uptake as a function of concentration was modelled and deconvolved into saturable high-affinity and low-affinity uptake components. The high-affinity (V1; left, representing binding to cubilin) and low-affinity (V2; middle, mediated by megalin binding) uptake capacities and the ratio of V2 to V1 (right) calculated for each independent experiment with Rescue and CIC-5 KO cells are plotted as individual points with the mean noted. Note the similar mean V2 to V1 ratio in Rescue and CIC-5 KO cells which indicates that high-affinity and low-affinity uptake components are similarly affected by CIC-5 KO. (D) Equivalent amounts of protein from Rescue and CIC-5 KO cells were blotted for cubilin. The quantified band intensity for each independent experiment was normalized to Rescue cl. \* $P=0.0182$  ( $n=6$ ) using one-way ANOVA Tukey's multiple comparison test. A representative blot is shown to right. Arrow indicates band at expected molecular weight for cubilin. \*Indicates background band.

**Figure S3. Quantitation of the overlap between endocytic markers in Rescue and CIC-5 KO cells.** Rescue and CIC-5 KO cells cultured on permeable supports were fixed and processed to detect colocalization between the indicated pairs of endocytic compartment markers. Quantification by Manders' coefficient over the entire z-stack for (A) EEA1 and Rab7, (B) EEA1 and Rab11a, and (C) Rab7 and Rab11a is shown as the percent of total. Each point represents a single z-stack image. \*\* $P=0.009$  ( $n=13-15$ ) using one-way ANOVA Tukey's multiple comparison test.

**Figure S4. Polarity of degraded  $^{125}\text{I}$ -albumin excretion is similar in Rescue and CIC-5 KO cells.** Rescue and CIC-5 KO cells were incubated with  $^{125}\text{I}$ -albumin and chased for 60 min. The apical and basal media were collected, and cells solubilized. Each sample was TCA precipitated to determine how much  $^{125}\text{I}$ -albumin was intact versus degraded. The graphs show the average fraction of total internalized  $^{125}\text{I}$ -albumin that is degraded or intact in the (A) cell lysate, (B) apical media, and (C) basal media. Each point represents an independent experiment ( $n=3$ ).

**Figure S5. Megalin expression is altered by expression of the uncoupled CIC-5 mutant.** (A) Rescue, CIC-5 KO, and Uncoupled cells on permeable supports were fixed and processed to detect actin using

fluorescent phalloidin. Representative maximum projections are shown with single XZ sections shown below. Scale bar: 20  $\mu\text{m}$ . (B) Quantification of the height of the cell monolayer based on actin staining. Each point represents the maximum height of actin staining in a single XZ section (n=28-33 from 3 z-stacks per cell line). (C) Megalin (*Lrp2*) and Cubilin (*Cubn*) transcripts in clones expressing WT CIC-5 or the Uncoupled CIC-5 mutant E211G were determined using quantitative PCR and normalized to *Gapdh* transcript levels. Relative fold change (RFC) of CIC-5 KO cells compared with Rescue cells (normalized to 1; dotted line) is plotted. (D) The apical surfaces of Uncoupled cells was biotinylated, and total (5%) and surface megalin were quantified by blotting. A representative blot is shown above the graph. (E) Rescue, CIC-5 KO, and Uncoupled cells were incubated for 30 min with 100  $\mu\text{g}/\text{ml}$  Alexa Fluor 647 albumin on ice and surface bound albumin quantified as described in Methods and normalized to Rescue cells. \*\*\*\* $P < 0.0001$  (n=9-24) using one-way ANOVA Tukey's multiple comparison test. Data for Rescue and CIC-5 are the same as shown in Figure S2A and are plotted in dark gray. (F) Degradation kinetics of apically biotinylated megalin in Uncoupled cells were quantified as described in Methods. Data from 3 independent experiments were used to fit (black line) the degradation rate of megalin using estimates of fractional endocytic rate (Fig. 5D and Table S8) and the fraction of megalin at the apical surface (grey lines: 95% CI). A representative blot showing the decrease in biotinylated megalin over time is shown above the graph. The estimated half-life of surface megalin is shown in the bottom left corner of the graph.

**Figure S6. Megalin distribution is altered by the expression of uncoupled CIC-5 mutant.** (A-E) Uncoupled cells on permeable supports were fixed and processed to detect colocalization between the indicated pairs of endocytic compartment markers. Quantification by Manders' coefficient over the entire z-stack for (A) megalin with each of the endocytic markers, (B) EEA1 and Rab7, (C) EEA1 and Rab11a, and (D) Rab7 and Rab11a is shown as the percent of total. Each point represents a single z-stack image. \*\* $P = 0.0073$  (n=22) and \*\*\* $P = 0.0007$  (n=15) using one-way ANOVA Tukey's multiple comparison test. (E) The average fractional distribution of EEA1 (n=52), Rab7 (n=54), Rab11a (n=45), and megalin (n=76) over the z-axis of a cell, from 0 (apical) to 1 (basal), is plotted. Note the stronger basolateral shift of the megalin distribution of Uncoupled cells compared to CIC-5 KO and Rescue cells (compare to Fig 3F). (F) Representative maximum projections of EEA1 in single cells in Rescue, CIC-5 KO, and Uncoupled cells. Scale bar: 5  $\mu\text{m}$  (G) Quantification of the number and total area of EEA1 spots per cell. Masks were generated from maximum projections of EEA1 staining in cell singles. The number of individual spots and total area in each mask were quantified. This analysis was performed using MATLAB R2021a.

**Figure S7. Simulated effect of error in biochemical measurements and assumptions on intracellular trafficking kinetics.** (A) The sensitivity of AEE maturation rates ( $k_{m,1}$ ,  $k_{f,s}$ ) to error in fraction at the surface ( $f_s$ ) measurements for Rescue, CIC-5 KO, Uncoupled cells.  $f_s$  is plotted relative to the measured values, 6.2%, 5.1%, and 6.7%, respectively (1.0 on x-axis). (B) The sensitivity of AEE maturation rates ( $k_{m,1}$ ,  $k_{f,s}$ ) to error in endocytic rate ( $k_L$ ) measurements for Rescue, CIC-5 KO, Uncoupled cells.  $k_L$  is plotted relative to the fit values provided in Table S9 (1.0 on x-axis). (C-E) Intracellular trafficking rates (C)  $k_{m,1}$ , (D)  $k_{f,s}$ , (E) and  $k_{L}$ , which are dependent on the fraction of megalin recycling through AVs ( $\alpha$ ) are plotted in response to changes in  $\alpha$  for Rescue, CIC-5 KO, and Uncoupled cells. Note that for all values of  $\alpha$  the predicted values of  $k_{m,1}$  and  $k_{f,s}$  for CIC-5 KO and Uncoupled cells are lower than those for Rescue cells. (F) Schematic of kinetic model of megalin traffic in the PT with trafficking rates denoted.

**Figure S8. Sensitivity of megalin internalization to intracellular trafficking kinetics.** (A-B) Megalin internalization in CIC-5 KO (A) and Uncoupled (B) cells in response to changes in intracellular trafficking

rates,  $k_m$ ,  $k_{in}$ ,  $k_{out}$ , and  $k_L$ . Rates are plotted relative to the fit values provided in Table S9 (1.0 on x-axis). The black dotted lines represent the estimated number of megalin molecules internalized per minute in Rescue cells per 10000 molecules of total megalin. Based on blotting data (Fig. 5C), CIC-5 KO and Uncoupled cells have 8,437 and 6,756 total megalin molecules, respectively, when the rate fold-change is 1. Note that changing  $k_L$  (green line) does not affect megalin internalization. This is due to a reduction in total megalin levels as a consequence of increased cycling through the endocytic pathway. The model predicts a ~30% reduction in total megalin in CIC-5 KO cells when  $k_L$  is doubled. (C) Schematic of kinetic model of megalin traffic in the PT with trafficking rates denoted.

**Figure S9. Calibration curves for chloride concentrations and pH.** (A) Cells on filter supports preloaded with BAC- and TMR- dextrans were incubated with ionophores and buffers with indicated  $[Cl^-]$  and imaged by confocal microscopy. The ratios of TMR to BAC intensity were measured as described in Methods and fit by linear regression. (B) Representative raw regions of interest (ROIs) of endosomal spots containing internalized BAC- and TMR-dextrans under 0mM or 50mM  $[Cl^-]$  conditions used in the calibration curve, showing the changes in relative intensities. Scale bar: 1  $\mu$ m. (C) Cells on filter supports preloaded with FITC- and Alexa Fluor 647-dextrans were incubated with ionophores and buffers with indicated pH and imaged by confocal microscopy. The ratios of FITC to 647 intensity were measured as described in Methods and fit by nonlinear regression with an exponential growth curve. (D) Representative raw ROIs of endosomal spots containing internalized FITC- and 647-dextrans under pH 5.5 or pH 7.5 conditions used in the calibration curve. Scale bar: 1  $\mu$ m.

**Figure S10. Characterization of CIC-5 KO mice.** (A) Genomic DNA from the founder male was amplified and sequenced in both directions with primers in Table S5. The consensus sequence was blasted against the wild type mouse genome. Upper case text shows shared sequence between WT and CIC-5 KO mice. Forward and reverse primers are indicated in dark blue font. The 189 bp deletion is indicated in lowercase red font. The codon encoding the gating glutamate (E211) is marked by the black box and the vertical black bar indicates the end of exon 6. WT genomic DNA section correlates to nucleotides 7,036,328-7,036,857 in GRCm39. (B) Predicted protein sequence of WT and CIC-5 KO mice showing early stop denoted by \*. The gating glutamate (E211) is shown in green. Bold font in CIC-5 KO indicates amino acid sequence different from WT. (C) Kidney sections from WT mice (left panel) and CIC-5 KO mice (center, right panels) were stained by H&E. The black box shows a 2X zoom-in of the CIC-5 KO mouse kidney section, highlighting proteinaceous casts (example denoted by the asterisk). (D) Equal volumes of urine collected from WT and CLC-5 KO mice were separated by SDS-PAGE on a stain-free gel to visualize total protein in urine. Note the preferential increase in low molecular weight proteins in CIC-5 KO urine. The intense band at ~20 kDa in both lanes likely represents mouse urinary proteins (MUPs) commonly observed in urine from male mice. (E) Creatinine concentration was determined for each sample. Each symbol represents a different mouse and corresponds to the same mice in Figures 6A, C and 7E, F.

# Shipman et al. Figure S1

## A

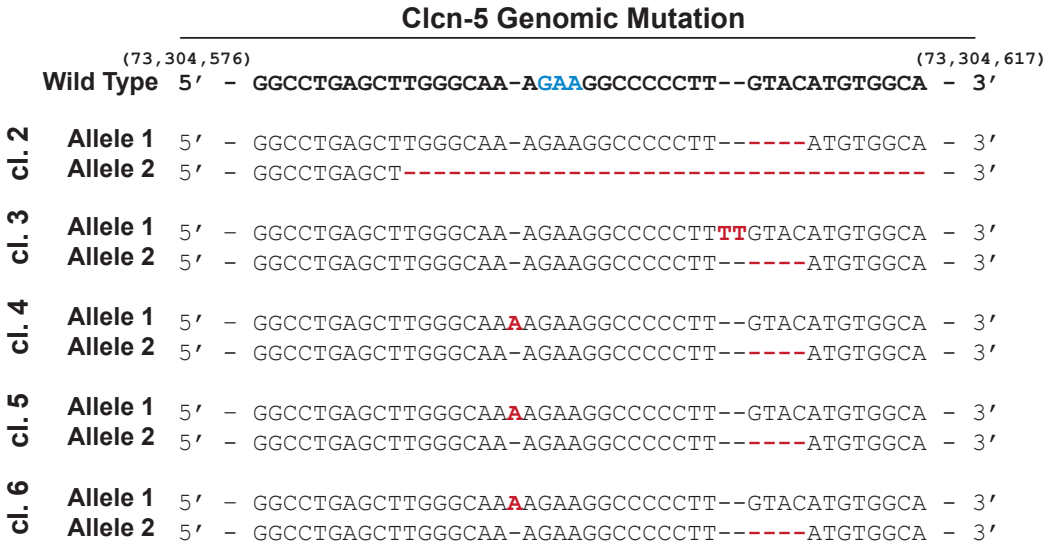

## B

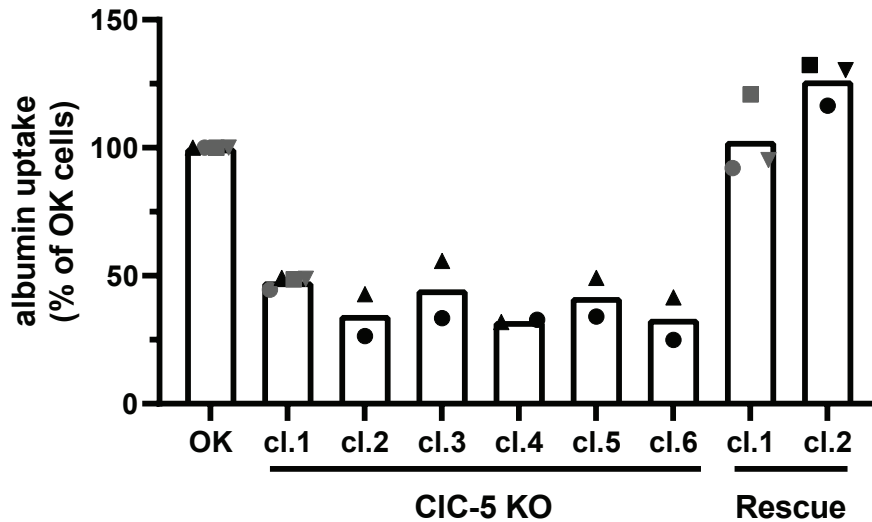



# Shipman et al. Figure S2

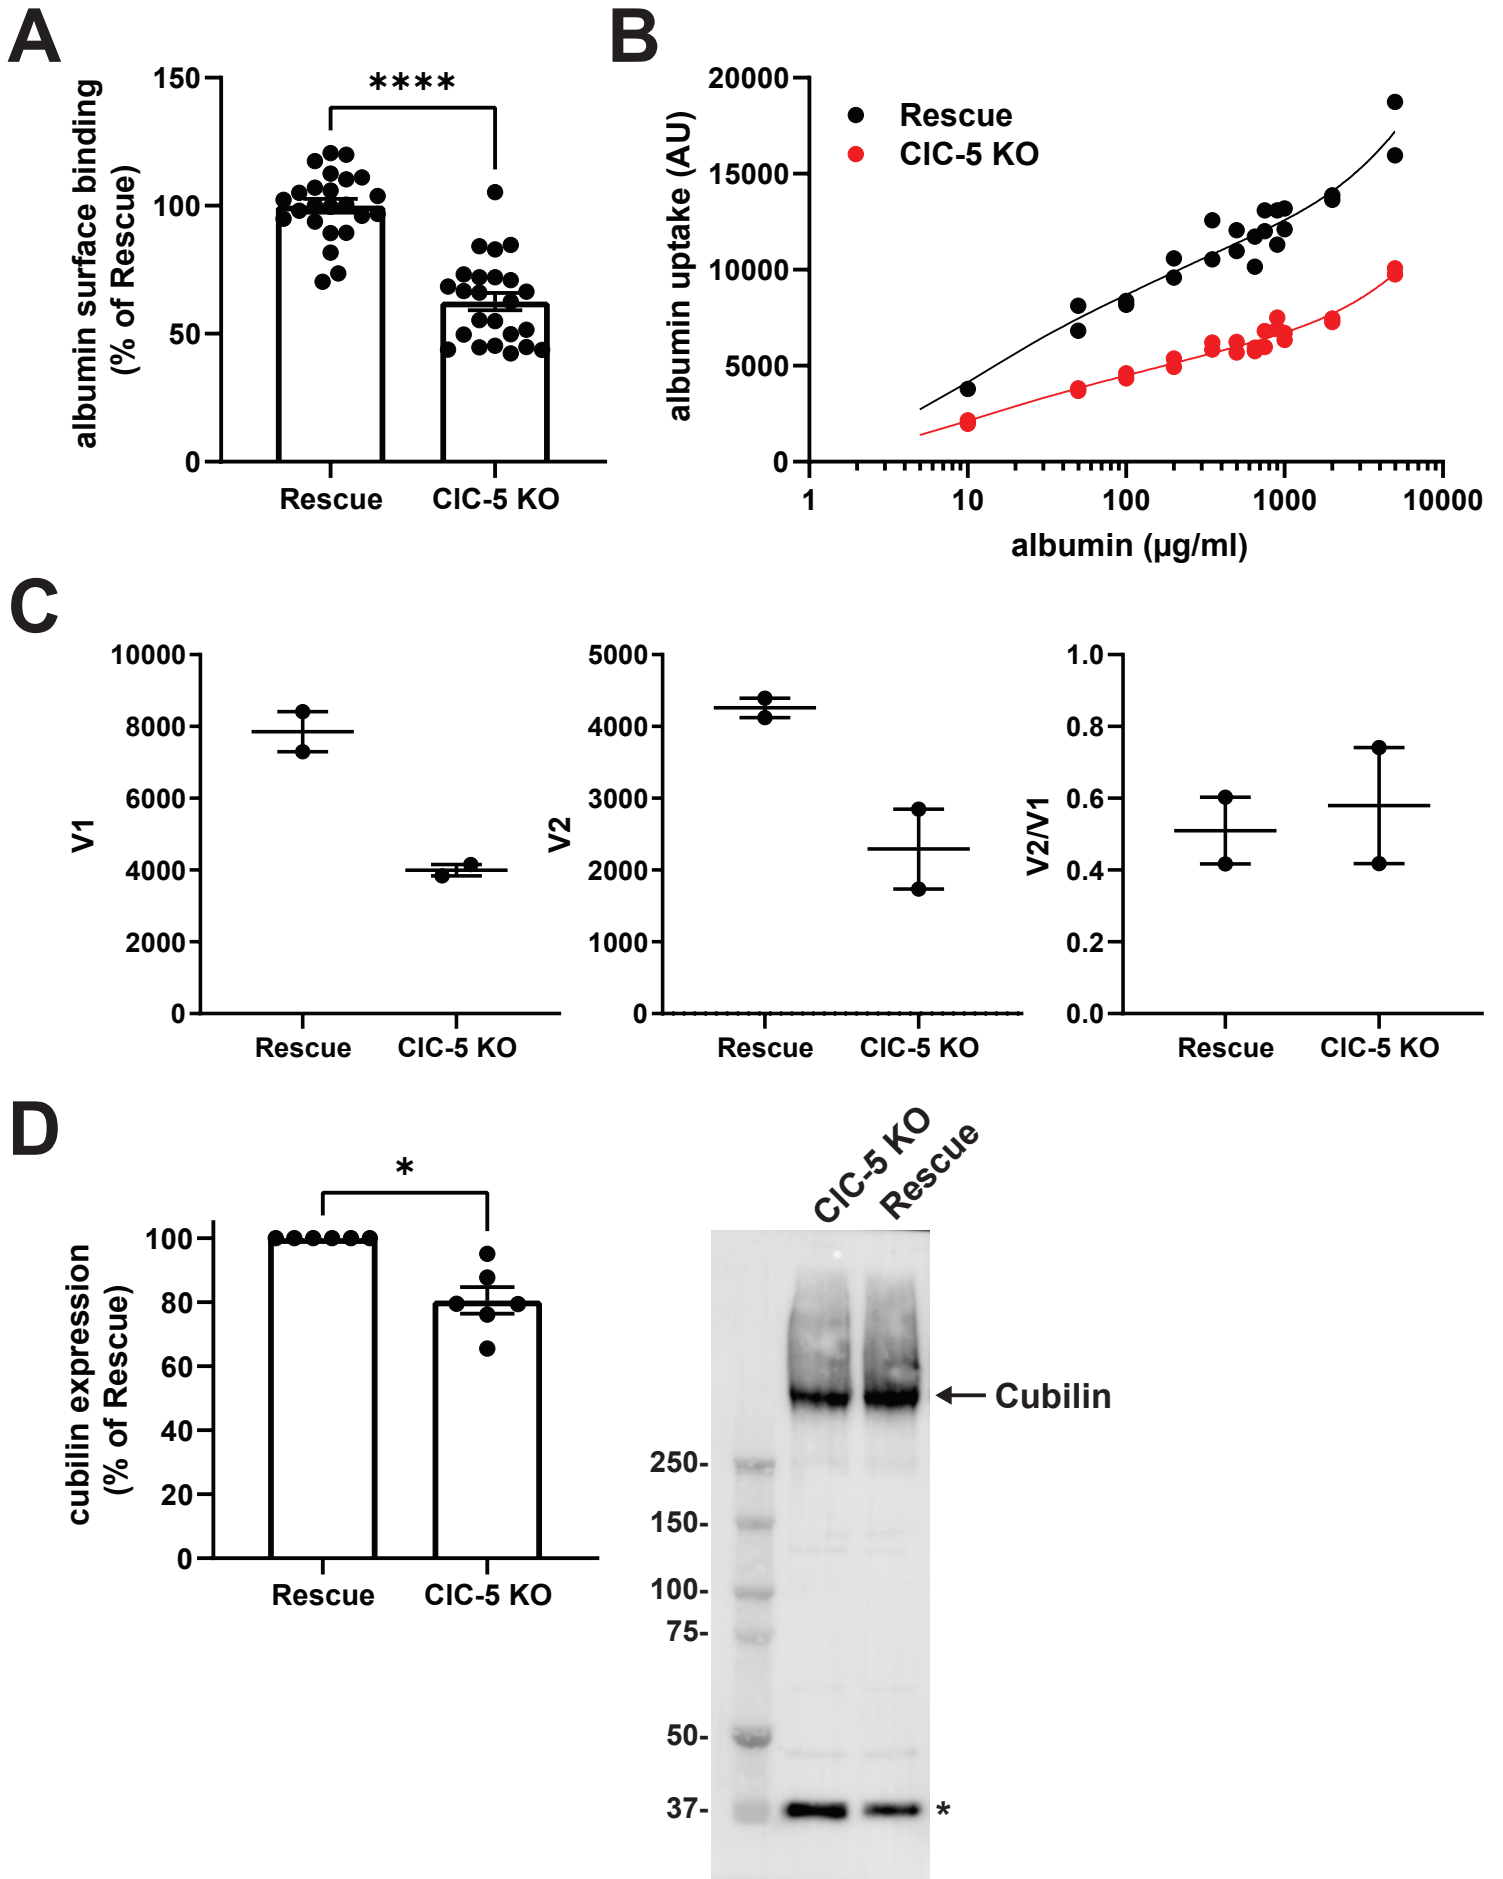

# Shipman et al. Figure S3

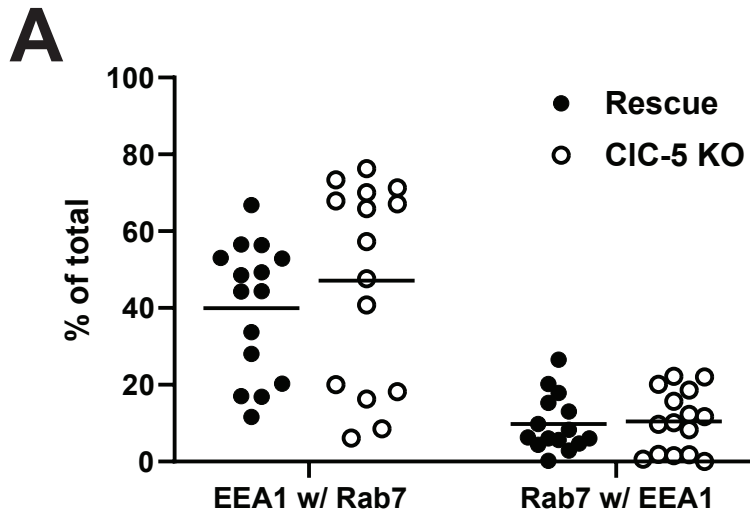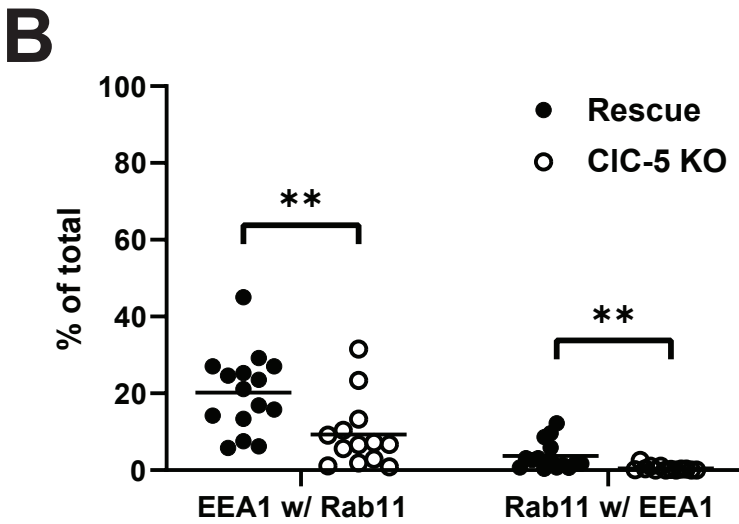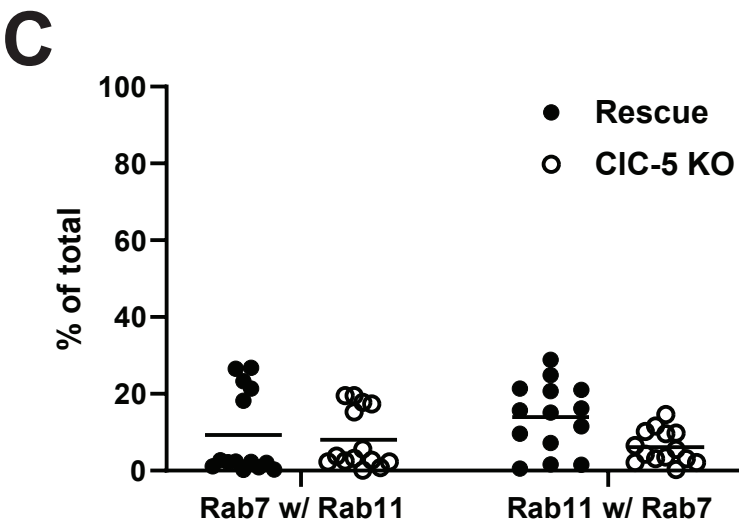

# Shipman et al. Figure S4

## A

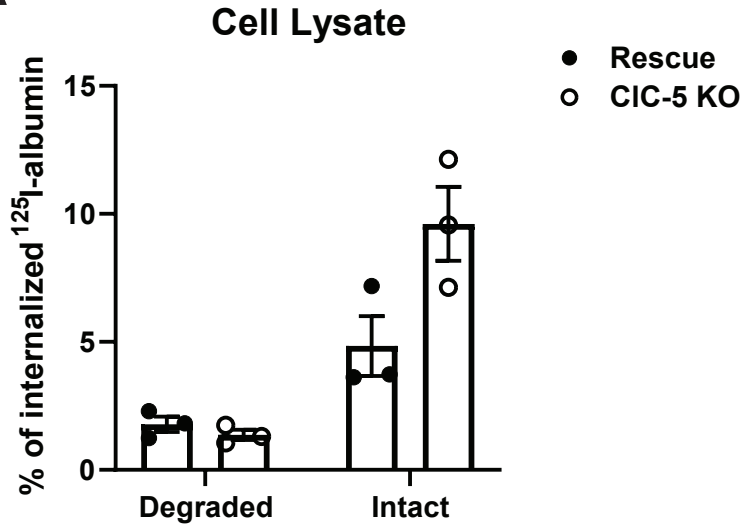

## B

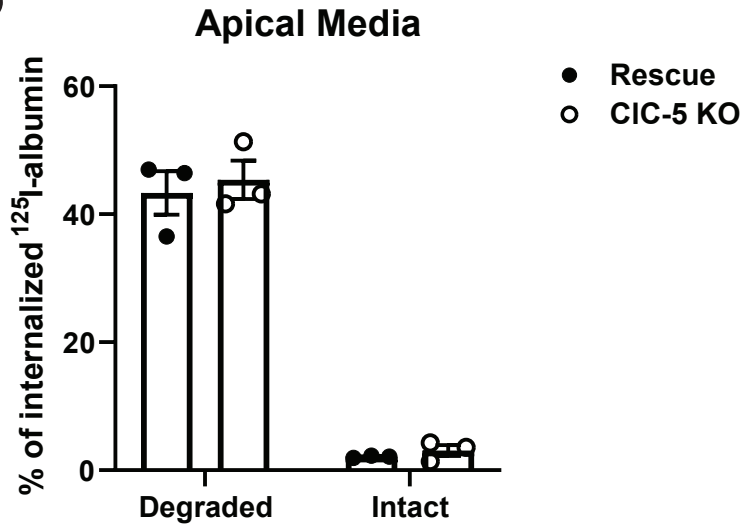

## C

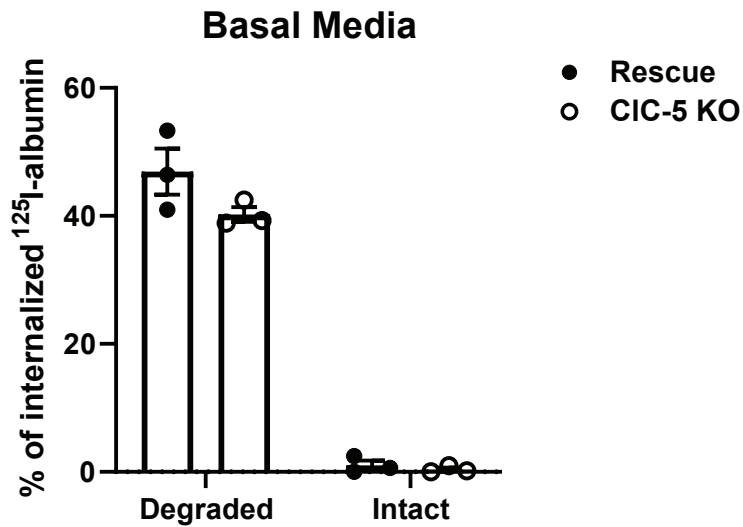

# Shipman et al. Figure S5

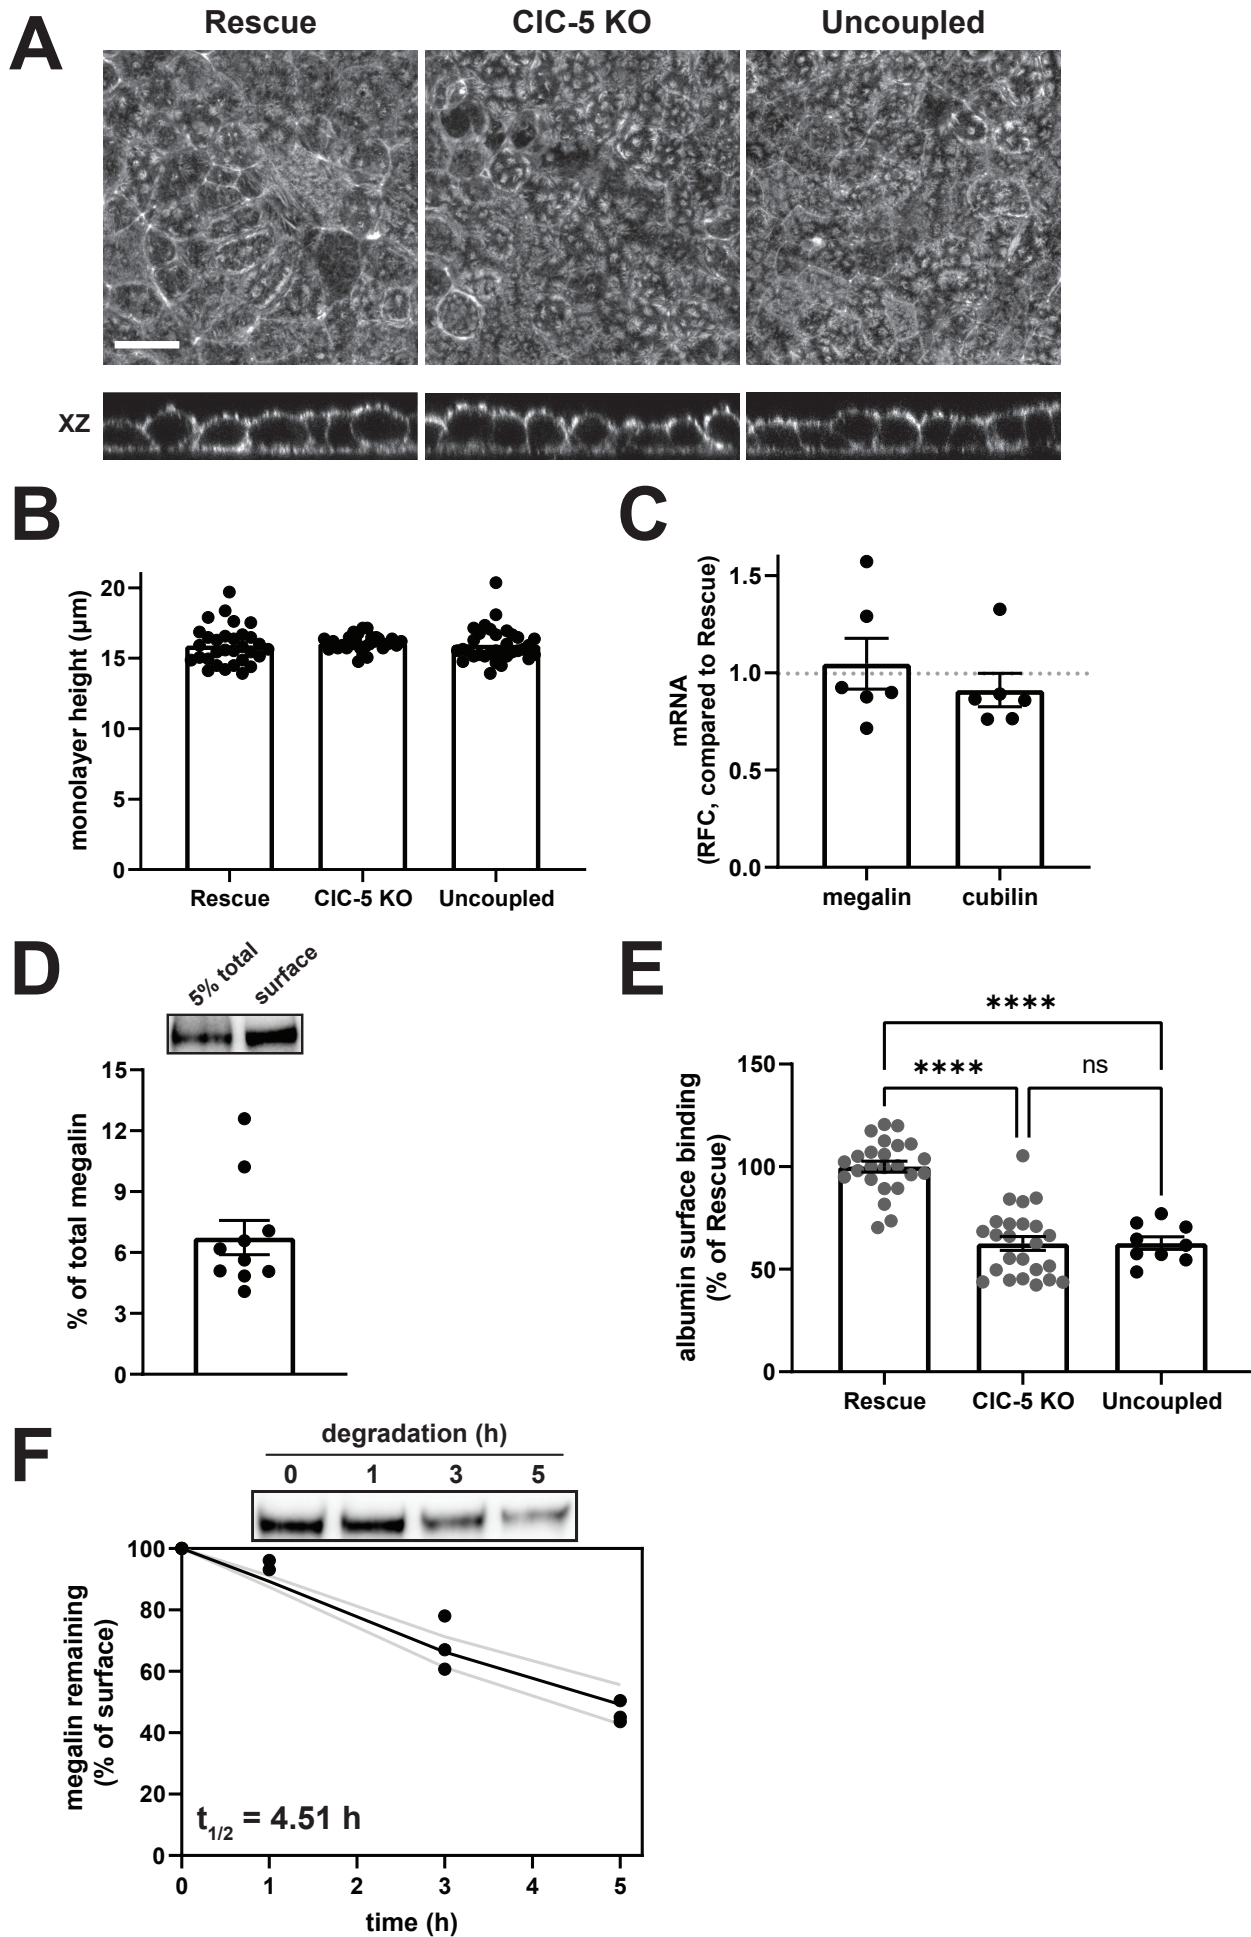

# Shipman et al. Figure S6

## A

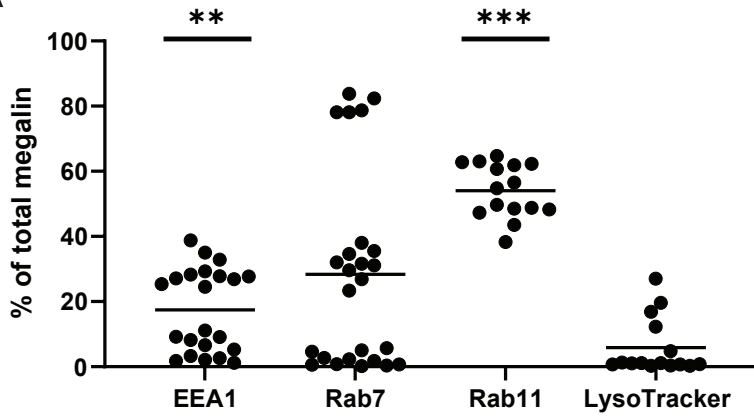

## B

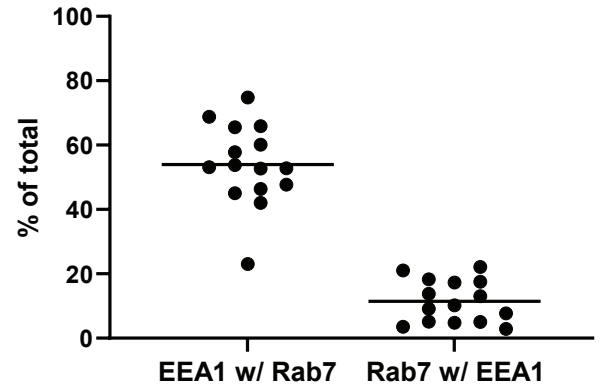

## C

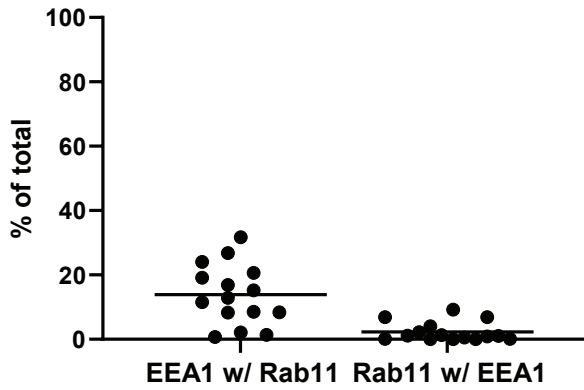

## D

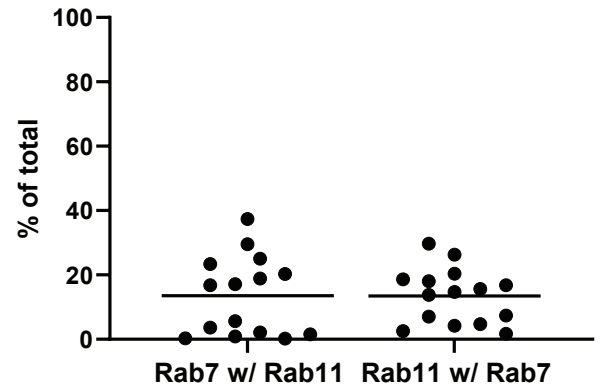

## E

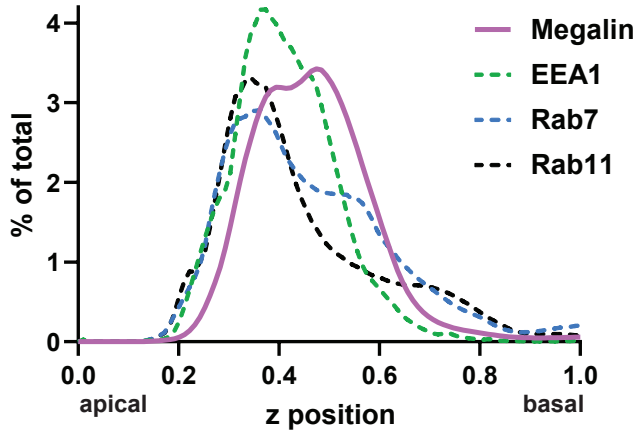

## F

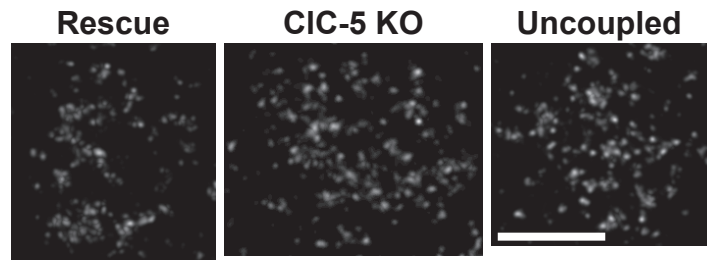

## G

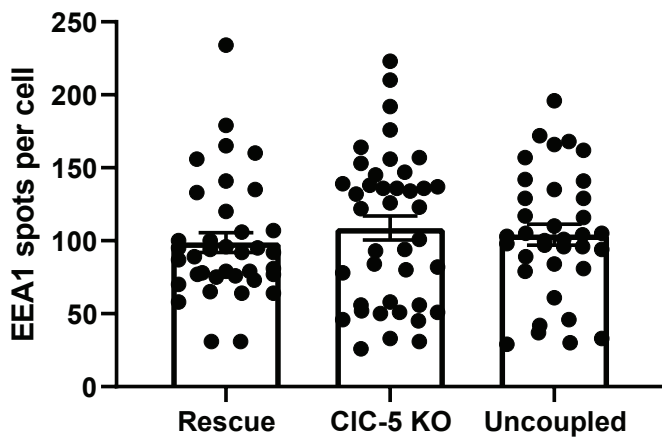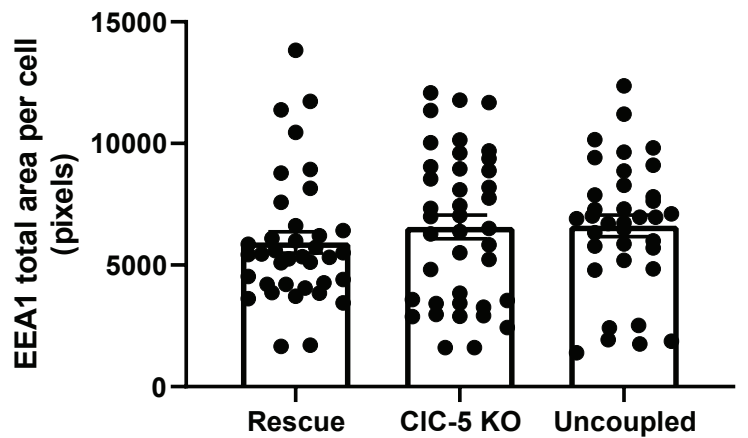

# Shipman et al. Figure S7

## A

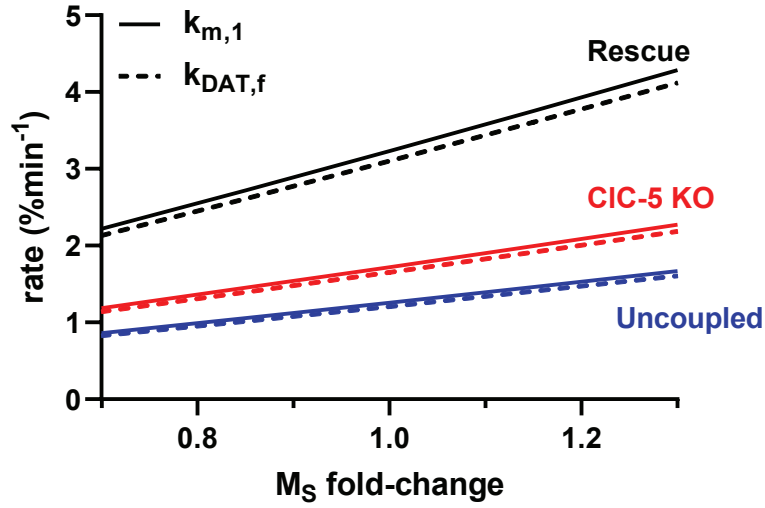

## B

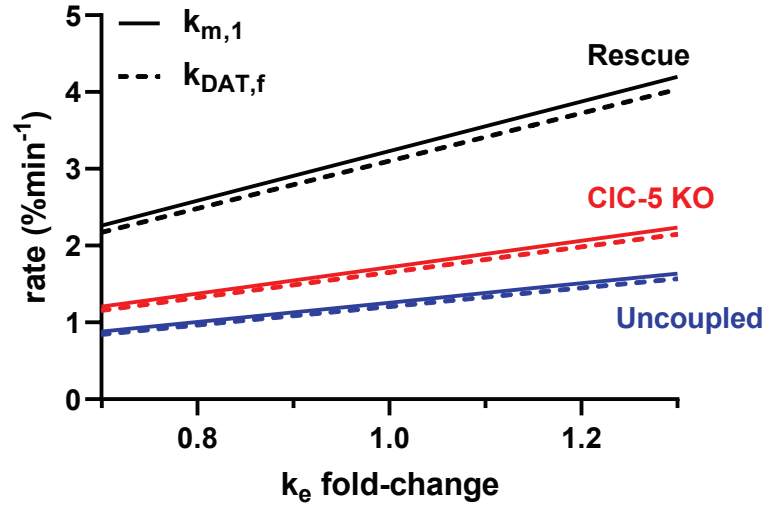

## C

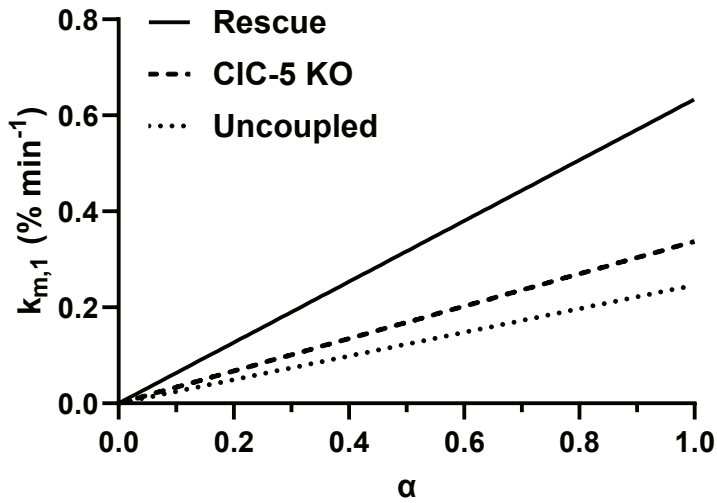

## D

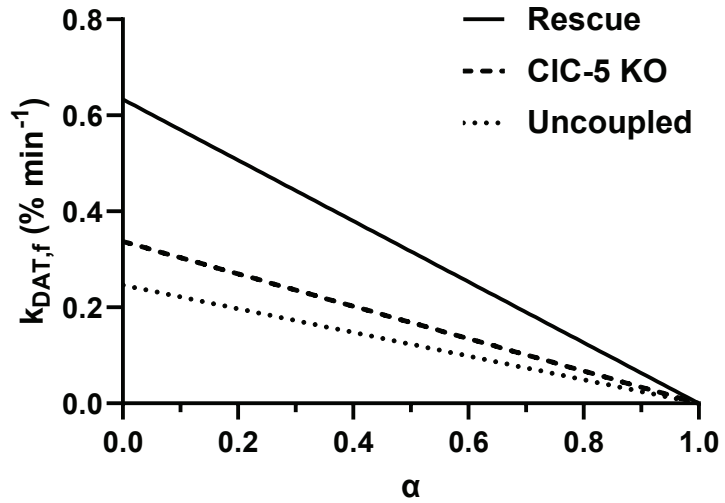

## E

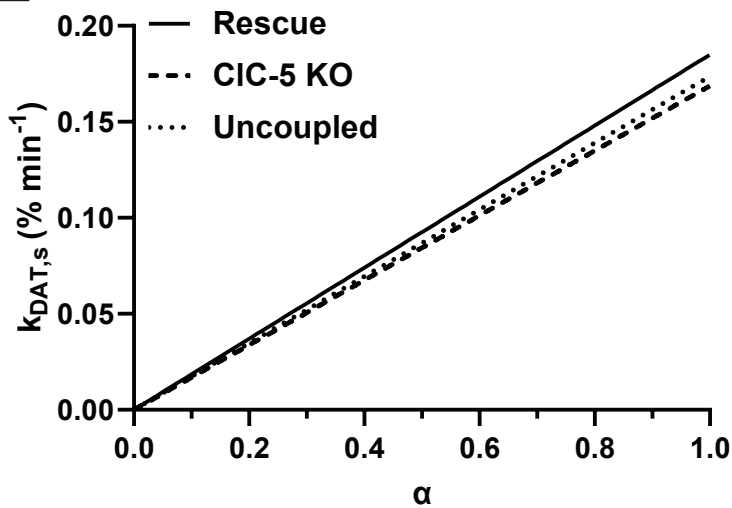

## F

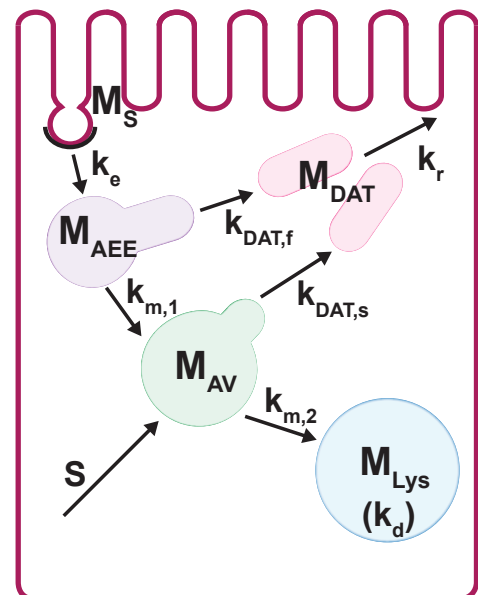

# Shipman et al. Figure S8

## A

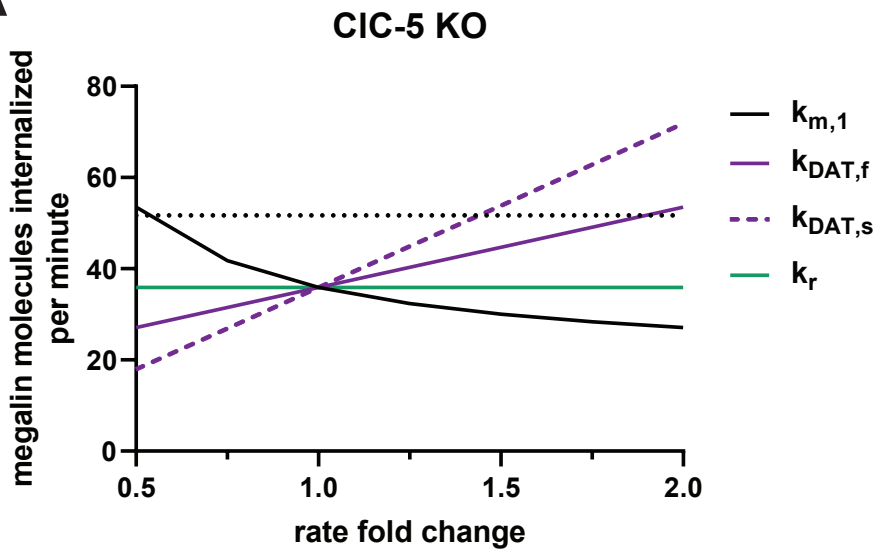

## B

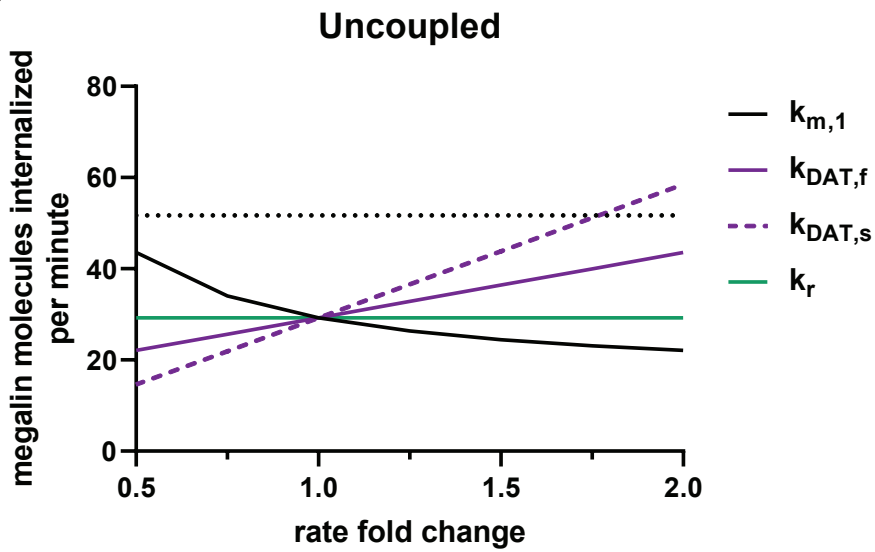

## C

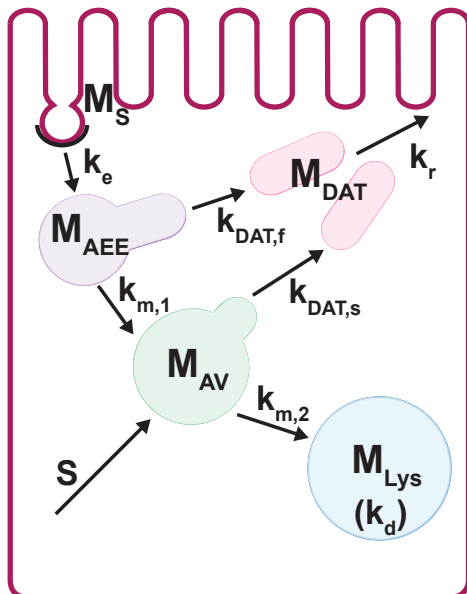

# Shipman et al. Figure S9

## A

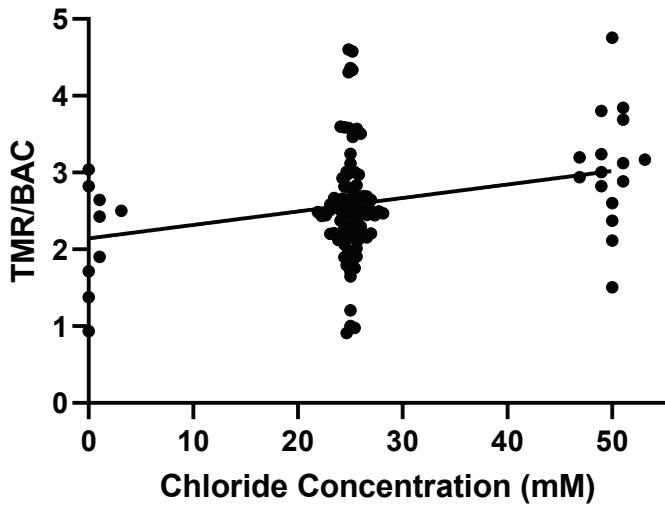

## B

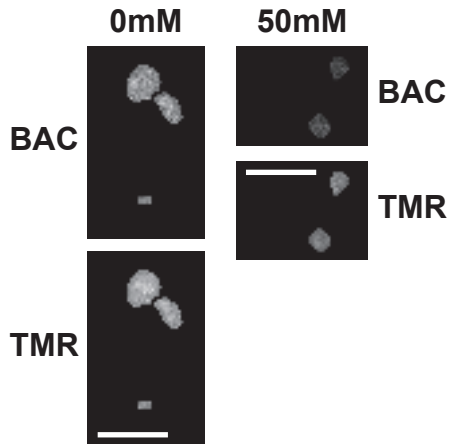

## C

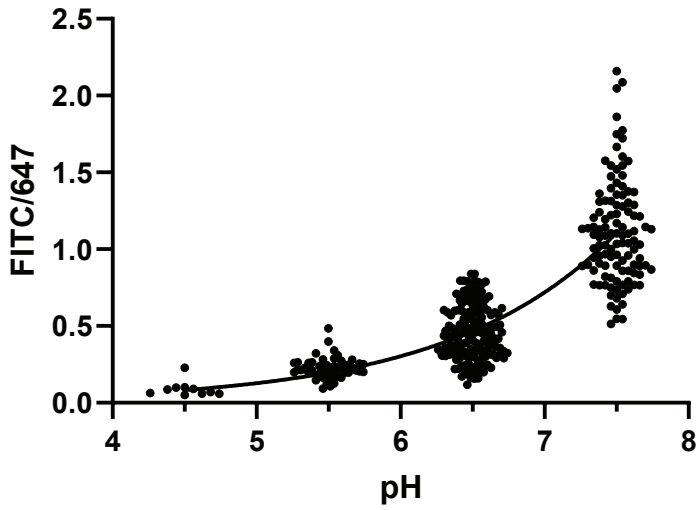

## D

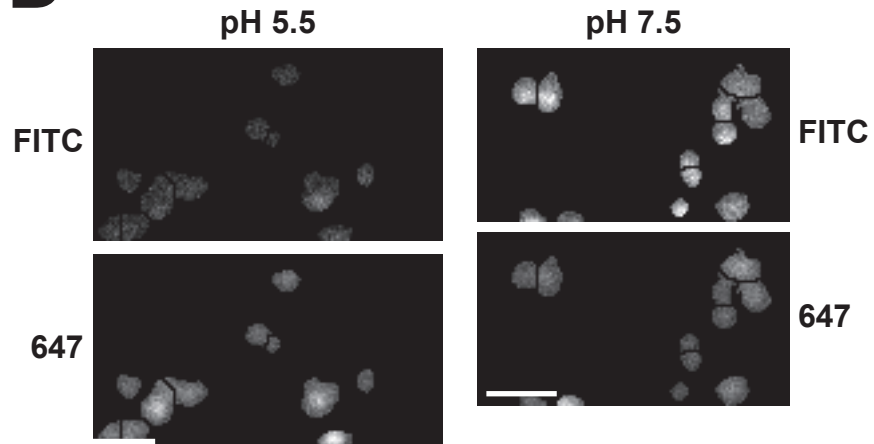



# Shipman et al. Figure S10

## A

```

TGCTGAGGAG TGATAGCGTT CTTGTGTGGG GTGTAGATTT GAACTGTTTA 7036807
GCCCTGTTTA TTTACGTAGT CTGTTTCCAA TCTCTCTGTG TTTGGCCTGC 7036757
AGATCAAAAC CATCCTGAGT GGTTCATTA TTAGAGGCTA TCTGGGTAAG 7036707
TGGACCCTTG TCATCAAAAC TATCACTTTG GTGTTGGCGG TGTCATCTGG 7036657
CTTGAGCctg ggcaaggag gccccctggt gcacgtggct tgctgctgtg 7036607
ggaacatctt gtgccactgc ttcaacaaat accggaagaa tgaagccaag 7036557
cggagagagg taaggacatg tgactttaac agccaccac caccaccttc 7036507
caccctgtgc tctctaacc cctcaggagc agaagtactg tgctctCAGA 7036457
GATCAAAATT TGGGGATTTT ATGAGGGTAA ATTCAAATAG CTTTTAGTTC 7036407
TGCAGGTTCA GTTCTAGGAG TCCATCTTTT AGCCATCTTA GCATGTGTTT 7036357
ATATATCCAC AGGTGTTTAG GGATACTCA
    
```

## B

(173) (224)

**Wild Type** N' -IKTILSGFIIIRGYLGKWTLVIKTITLVLAVSSGLSLGK**E**GPLVHVACCCGNI-C'

**CIC-5 KO** N' -IKTILSGFIIIRGYLGKWTLVIKTITLVLAVSSGLS**QRSKEGDFMRVNSNSF\***-C'

## C

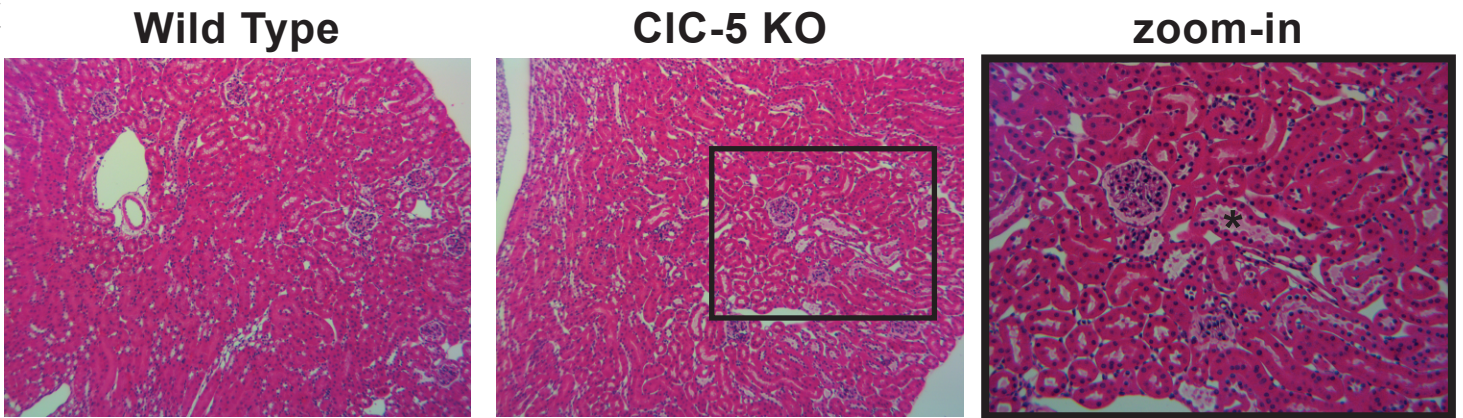

## D

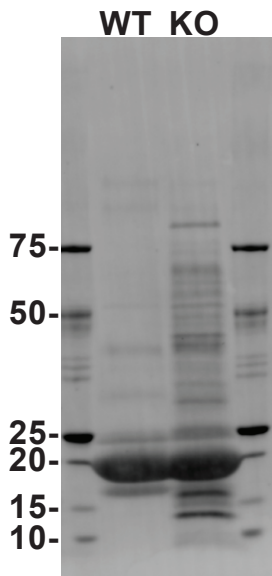

## E

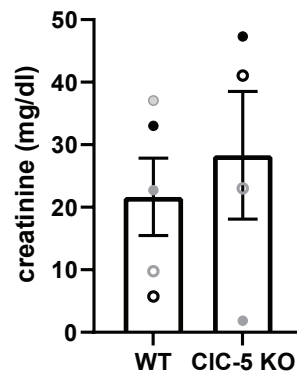

Supplement: jasn-34-619-s001.pdf [file jasn-34-619-s001.pdf]
